# Supplementary material for: Rapid screening of MMACHC gene mutations by high‐resolution melting curve analysis
Source: PubMed Central journal article supplement — Mol Genet Genomic Med. 2020 Mar 21;8(6):e1221. doi: 10.1002/mgg3.1221 (PMC7284048; doi:10.1002/mgg3.1221), 2020-03-21

Urine GC/MS, dried blood spots MS/MS and serum total homocysteine test

MMA combined with HC

Isolated MMA

**PCR-HRM analysis**  
for MMACHC

Next-generation sequencing

Compound  
heterozygous mutations

Negative

Single  
heterozygous mutation

Sanger sequencing validation

Specially designed method for  
mutation c.609G>A (p.Trp203Ter)

Next-generation sequencing

Homozygous difference plots

Indifference plots

Sanger sequencing validation

Next-generation sequencing

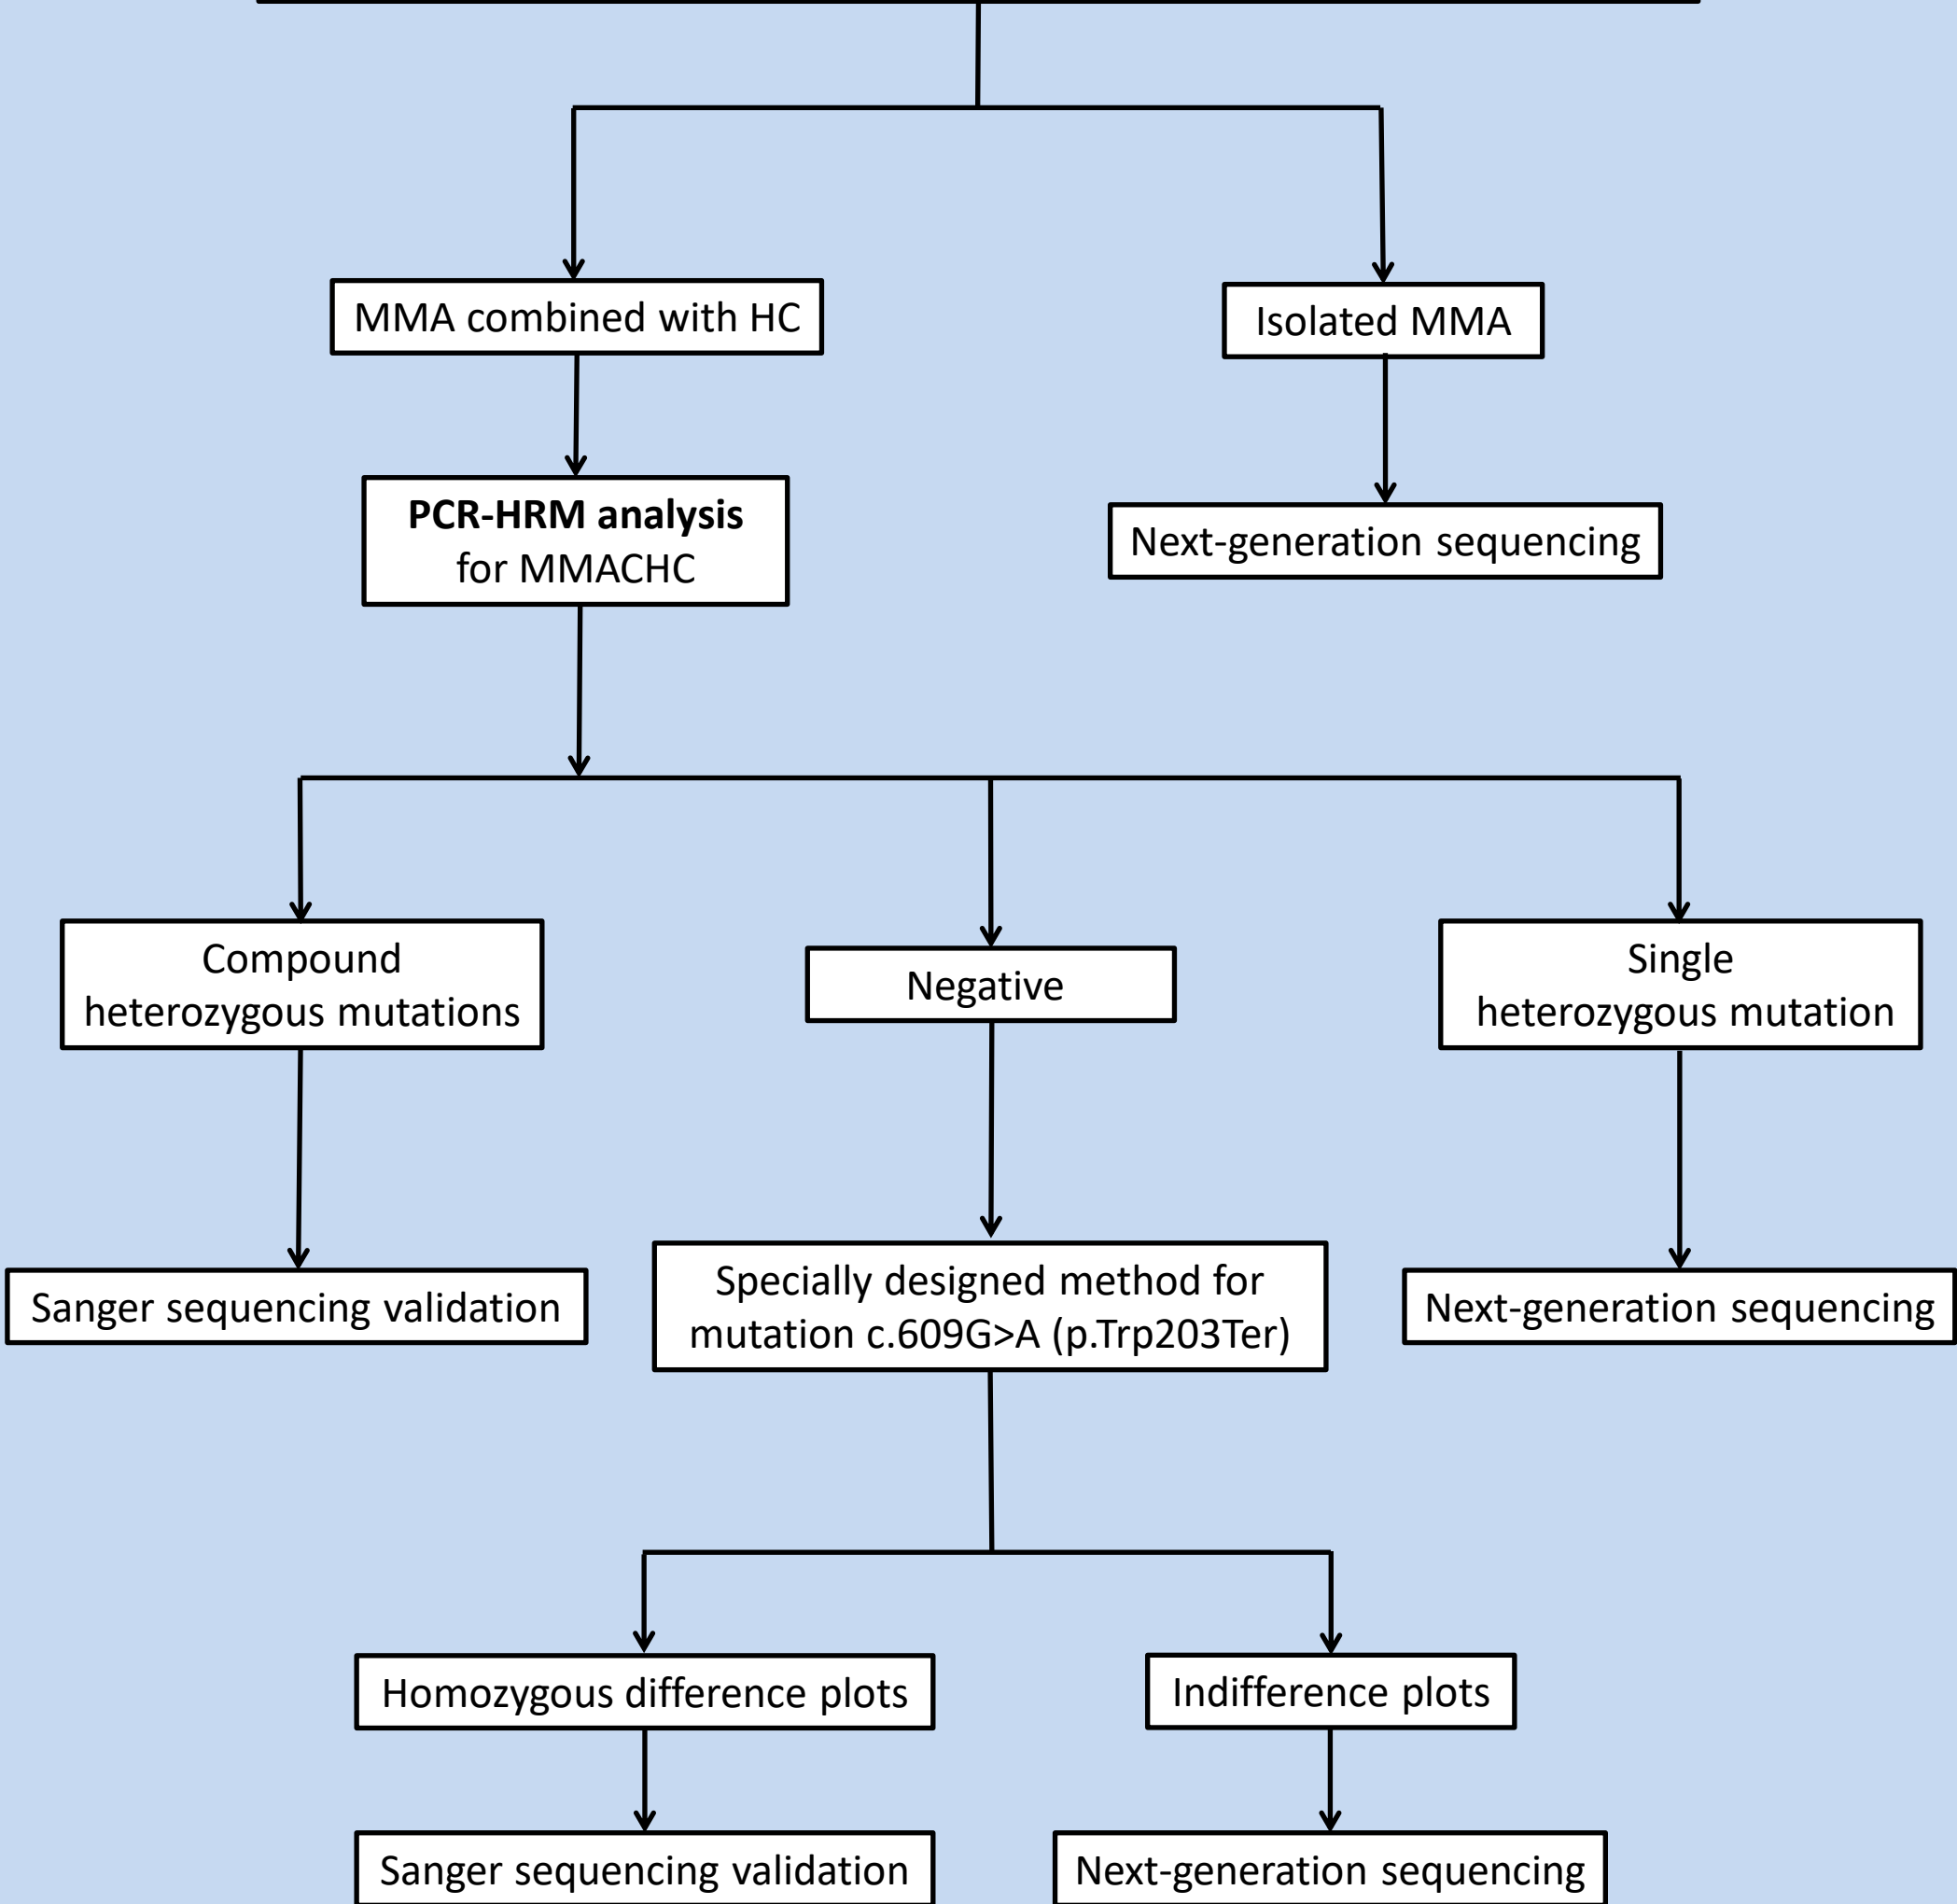

Supplement: MGG3-8-e1221-s001.pdf [file MGG3-8-e1221-s001.pdf]
